# Supplementary material for: Cloning and functional verification of Geraniol-10-Hydroxylase gene in Lonicera japonica
Source: PeerJ. 2025 Jan 13;13:e18832. doi: 10.7717/peerj.18832 (PMC11737341; doi:10.7717/peerj.18832)
Supplement: Supplemental Information 3 [file peerj-13-18832-s003.xls]

## Sheet: Sheet1
ITEM TO CHECK	IMPORTANCE	CHECKLIST
EXPERIMENTAL DESIGN
Definition of experimental and control groups	E	Line 97 147 181
Number within each group	E	Line 86
Assay carried out by core lab or investigator's lab?	D
Acknowledgement of authors' contributions	D
SAMPLE
Description	E	Line 97 147 181
Volume/mass of sample processed	D
Microdissection or macrodissection	E	Not Applicable
Processing procedure	E	Line 85-86
If frozen - how and how quickly?	E	Line 85-86
If fixed - with what, how quickly?	E	Line 85-86
Sample storage conditions and duration (especially for FFPE samples)	E	Line 85-86
NUCLEIC ACID EXTRACTION
Procedure and/or instrumentation	E	Line 97-98
Name of kit and details of any modifications	E	Line 97-98
Source of additional reagents used	D
Details of DNase or RNAse treatment	E	Line 97-98
Contamination assessment (DNA or RNA)	E	Line 98-99
Nucleic acid quantification	E	Line 99-100
Instrument and method	E	Line 99-100
Purity (A260/A280)	D
Yield	D
RNA integrity method/instrument	E	Line 97-98
RIN/RQI or Cq of 3' and 5' transcripts	E	Line 97-98
Electrophoresis traces	D
Inhibition testing (Cq dilutions, spike or other)	E	Not Applicable
REVERSE TRANSCRIPTION
Complete reaction conditions	E	Line 100-101
Amount of RNA and reaction volume	E	Line 100-101
Priming oligonucleotide (if using GSP) and concentration	E	Line 100-101
Reverse transcriptase and concentration	E	Line 100-101
Temperature and time	E	Line 100-101
Manufacturer of reagents and catalogue numbers	D
Cqs with and without RT	D*
Storage conditions of cDNA	D
qPCR TARGET INFORMATION
If multiplex, efficiency and LOD of each assay.	E	Not Applicable
Sequence accession number	E	table 1
Location of amplicon	D
Amplicon length	E	Line 189-190
In silico specificity screen (BLAST, etc)	E	Not Applicable
Pseudogenes, retropseudogenes or other homologs?	D
Sequence alignment	D
Secondary structure analysis of amplicon	D
Location of each primer by exon or intron (if applicable)	E	Not Applicable
What splice variants are targeted?	E	Not Applicable
qPCR OLIGONUCLEOTIDES
Primer sequences	E	table 1
RTPrimerDB Identification Number	D
Probe sequences	D**
Location and identity of any modifications	E	Not Applicable
Manufacturer of oligonucleotides	D
Purification method	D
qPCR PROTOCOL
Complete reaction conditions	E	Line 104-106
Reaction volume and amount of cDNA/DNA	E	Line 104-106
Primer, (probe), Mg++ and dNTP concentrations	E	Line 104-106
Polymerase identity and concentration	E	Line 104-106
Buffer/kit identity and manufacturer	E	Line 104-106
Exact chemical constitution of the buffer	D
Additives (SYBR Green I, DMSO, etc.)	E	The 2X Taq Pro Universal SYBR qPCR Master Mix already includes SYBR Green I and other necessary additives.
Manufacturer of plates/tubes and catalog number	D
Complete thermocycling parameters	E	Line 104-106
Reaction setup (manual/robotic)	D
Manufacturer of qPCR instrument	E	Line 104
qPCR VALIDATION
Evidence of optimisation (from gradients)	D
Specificity (gel, sequence, melt, or digest)	E	Melt
For SYBR Green I, Cq of the NTC	E	The each Cq values of the no-template control (NCT) was undetectabl
Standard curves with slope and y-intercept	E	Slopes of calibration curves were - 3.54 and a y-intercept around -34.40.
PCR efficiency calculated from slope	E	The PCR efficiency was 105%-110%
Confidence interval for PCR efficiency or standard error	D
r2 of standard curve	E	≥0.98
Linear dynamic range	E	Not Applicable
Cq variation at lower limit	E	Not Applicable
Confidence intervals throughout range	D
Evidence for limit of detection	E	Not Applicable
If multiplex, efficiency and LOD of each assay.	E	Not Applicable
DATA ANALYSIS
qPCR analysis program (source, version)	E	Two-step PCR reaction program,
Cq method determination	E	The Cq value was determined using the second derivative maximum method.
Outlier identification and disposition	E	Cq Std. Dev more than 0.3 .
Results of NTCs	E	Not Applicable
Justification of number and choice of reference genes	E	According to the previous data of our laboratory
Description of normalisation method	E	The expression data was normalized to the geometric mean of our reference genes using the ﾎ釆任q method.
Number and concordance of biological replicates	D
Number and stage (RT or qPCR) of technical replicates	E	Line183-185
Repeatability (intra-assay variation)	E	Line183-185
Reproducibility (inter-assay variation, %CV)	D
Power analysis	D
Statistical methods for result significance	E	Line183-185
Software (source, version)	E	Line183-185
Cq or raw data submission using RDML	D
Table 1. MIQE checklist for authors, reviewers and editors. All essential information (E) must be submitted with the manuscript. Desirable
information (D) should be submitted if available. If using primers obtained from RTPrimerDB, information on qPCR target, oligonucleotides,
protocols and validation is available from that source.
*: Assessing the absence of DNA using a no RT assay is essential when first extracting RNA. Once the sample has been validated as
RDNA-free, inclusion of a no-RT control is desirable, but no longer essential.
**: Disclosure of the probe sequence is highly desirable and strongly encouraged. However, since not all commercial pre-designed assay
vendors provide this information, it cannot be an essential requirement. Use of such assays is advised against.
We are very sorry
