# Supplementary material for: Cloning and functional verification of Geraniol-10-Hydroxylase gene in Lonicera japonica
Source: PeerJ. 2025 Jan 13;13:e18832. doi: 10.7717/peerj.18832 (PMC11737341; doi:10.7717/peerj.18832)
Supplement: Supplemental Information 4 — qRT-PCR and HPLC results for tissue-specific expression and silencing method expression. [file peerj-13-18832-s004.xlsx]

## Sheet: origin
standard curve
ingredient	standard curve	R2	linearity range(μg·mL-1)
loganin acid	y = 15685x - 23472	0.9999	6.25~400
morroniside	y = 15848x + 33739	1	6.25~400
swertiamarin	y = 12812x - 48097	0.9998	6.25~400
loganin	y = 11894x + 1737.4	1	6.25~400
dehydrogenation loganin	y = 13767x - 30937	0.9998	6.25~400
Overexpression
qRT-PCR
LjG10H relative transcript level
WT	OE-1	OE-2	OE-3	OE-4	OE-5	OE-6	OE-7	OE-8	OE-9
1	57.98	29.4336	127.747	13.1114	2.42424	54.6181	15.2688	90.7292	3.82941
1	47.9754	32.4131	125.858	17.3278	3.08495	61.0041	22.6373	91.0647	3.7929
1	32.1609	30.635	146.495	11.0742	2.43384	46.0374	12.8028	74.8361	6.93264
HPLC
Iridoid content
WT	OE3	OE6	OE8
0.492809	1.18507	0.642493	0.691204
0.49886	1.15203	0.648565	0.677105
0.505143	1.18938	0.656091	0.583482
Silencing
qRT-PCR
LjG10H relative transcript level
WT	Line-1	Line-2	Line-3	Line-4	Line-5	Line-6
1	0.257562	0.473207	0.569824	0.372918	0.126651	0.292107
1	0.262435	0.434423	0.491581	0.372307	0.122652	0.300713
1	0.252311	0.394727	0.443272	0.500713	0.14854	0.354928
HPLC
Iridoid content
WT	Line-2	Line-3	Line-4
6.91707	4.21783	4.51662	4.11134
7.15304	4.20516	4.08211	4.06244
7.07385	3.83752	5.00462	3.94059

## Sheet: Sheet1
Overexpression
qRT-PCR
LjG10H relative transcript level
WT	OE-1	OE-2	OE-3	OE-4	OE-5	OE-6	OE-7	OE-8	OE-9
1	37.7874	22.5943	84.1496	23.7687	49.517	76.0127	18.3369	55.1757	68.3543
1	25.9326	18.1912	67.5274	25.0089	59.8938	64.9903	13.7743	62.7097	49.1174
1	34.8637	23.4412	62.5675	18.9778	46.7857	58.3807	12.5479	55.4969	63.2645
WT	WT	WT	OE-1	OE-1	OE-1	OE-2	OE-2	OE-2	OE-3	OE-3	OE-3	OE-4	OE-4	OE-4	OE-5	OE-5	OE-5	OE-6	OE-6	OE-6	OE-7	OE-7	OE-7	OE-8	OE-8	OE-8	OE-9	OE-9	OE-9
21.7857	21.8477	21.411	24.0964	24.2759	24.2109	22.9949	22.7344	22.8514	22.6105	22.5583	22.7586	21.3345	21.3238	21.2072	23.2759	23.2926	23.1654	22.6547	22.733	22.5483	21.6	21.8761	21.6659	21.3393	21.3148	21.484	24.094	24.0343	24.1299
28.387	28.2812	28.2859	25.5484	25.7535	25.5362	25.0152	24.9922	25.0383	23.0556	23.0017	22.7561	23.4219	23.2226	23.4219	24.2942	24.274	24.2115	23.1249	23.1214	22.9009	24.3079	24.1035	24.1017	22.2093	22.3696	22.2133	24.5274	24.6188	24.7659
6.60128	6.43352	6.87488	1.45208	1.47757	1.32528	2.02035	2.25773	2.18689	0.445073	0.443485	-0.00250281	2.08746	1.89886	2.21477	1.01836	0.981389	1.04603	0.470222	0.388347	0.352633	2.70784	2.22735	2.43579	0.869961	1.05482	0.729274	0.43344	0.584455	0.636017
0	0	0	-5.1492	-4.95595	-5.5496	-4.58093	-4.17579	-4.68799	-6.15621	-5.99004	-6.87739	-4.51382	-4.53466	-4.66012	-5.58292	-5.45213	-5.82886	-6.13106	-6.04517	-6.52225	-3.89344	-4.20617	-4.4391	-5.73132	-5.3787	-6.14561	-6.16784	-5.84907	-6.23887
1	1	1	35.4866	31.0376	46.8379	23.9331	18.0733	25.7766	71.3186	63.5595	117.571	22.8452	23.1777	25.2834	47.9322	43.7779	56.8408	70.0862	66.0356	91.9164	14.8608	18.4579	21.6921	53.125	41.6053	70.7967	71.896	57.6427	75.5242
				37.7874			22.5943			84.1496			23.7687			49.517			76.0127			18.3369			55.1757			68.3543
WT	WT	WT	OE-1	OE-1	OE-1	OE-2	OE-2	OE-2	OE-3	OE-3	OE-3	OE-4	OE-4	OE-4	OE-5	OE-5	OE-5	OE-6	OE-6	OE-6	OE-7	OE-7	OE-7	OE-8	OE-8	OE-8	OE-9	OE-9	OE-9
21.7857	21.8477	21.411	23.8955	24.0007	23.7747	22.6461	22.6117	22.5012	22.4635	22.1874	22.3073	21.428	21.5837	21.2888	23.0298	23.1846	23.0923	22.7935	22.3468	22.4076	21.727	21.5946	21.5967	21.6956	21.3802	21.5339	23.6791	23.7273	23.8707
28.387	28.2812	28.2859	26.0312	25.7653	25.7299	24.7868	25.3273	25.0983	22.9967	22.9465	22.7827	23.4614	23.4225	23.4011	23.1585	24.6971	24.0464	23.1189	23.1339	23.2079	24.3719	24.4707	24.6615	22.2165	22.1522	22.2827	24.7338	24.6211	24.9881
6.60128	6.43352	6.87488	2.13574	1.76467	1.95518	2.14076	2.71556	2.59704	0.533221	0.75904	0.475403	2.03337	1.8388	2.11222	0.12874	1.51251	0.954037	0.325453	0.787059	0.80028	2.64488	2.87616	3.06479	0.520945	0.771993	0.748736	1.05472	0.893848	1.11742
0	0	0	-4.46554	-4.66885	-4.9197	-4.46052	-3.71796	-4.27784	-6.06806	-5.67448	-6.39948	-4.56791	-4.59472	-4.76266	-6.47254	-4.92101	-5.92085	-6.27583	-5.64646	-6.0746	-3.9564	-3.55736	-3.81009	-6.08033	-5.66153	-6.12615	-5.54656	-5.53967	-5.75746
1	1	1	22.0934	25.4369	30.2676	22.0165	13.1589	19.3981	67.0915	51.0727	84.4181	23.718	24.1629	27.1459	88.8032	30.2951	60.5832	77.484	50.0904	67.3966	15.5237	11.7726	14.0266	67.6649	50.6162	69.848	46.7392	46.5166	54.0964
				25.9326			18.1912			67.5274			25.0089			59.8938			64.9903			13.7743			62.7097			49.1174
WT	WT	WT	OE-1	OE-1	OE-1	OE-2	OE-2	OE-2	OE-3	OE-3	OE-3	OE-4	OE-4	OE-4	OE-5	OE-5	OE-5	OE-6	OE-6	OE-6	OE-7	OE-7	OE-7	OE-8	OE-8	OE-8	OE-9	OE-9	OE-9
21.7857	21.8477	21.411	24.07	24.2899	24.1257	22.8506	22.8046	22.8519	22.3471	22.2842	22.3296	21.2672	21.3216	21.3615	23.2184	23.2228	23.0862	22.5808	22.4736	22.5358	21.5032	21.3611	21.276	21.7005	21.59	21.1834	24.0771	23.8891	24.008
28.387	28.2812	28.2859	25.737	25.7888	25.5599	24.7197	25.0618	25.045	23.0171	22.8768	23.0885	24.368	23.3879	23.5938	24.383	24.1877	24.2395	23.1791	23.2108	23.5243	24.37	24.5176	24.2791	22.3096	22.3757	22.3386	24.6428	24.654	24.6865
6.60128	6.43352	6.87488	1.66697	1.49887	1.43417	1.8691	2.25726	2.1931	0.669941	0.592605	0.758872	3.10077	2.06625	2.23235	1.16459	0.96496	1.15335	0.598274	0.737133	0.98847	2.86682	3.15647	3.00305	0.609066	0.785738	1.15518	0.565734	0.764902	0.678522
0	0	0	-4.93431	-4.93465	-5.44071	-4.73218	-4.17626	-4.68178	-5.93134	-5.84092	-6.11601	-3.50051	-4.36727	-4.64254	-5.43669	-5.46856	-5.72153	-6.00301	-5.69639	-5.88641	-3.73446	-3.27705	-3.87183	-5.99221	-5.64778	-5.7197	-6.03555	-5.66862	-6.19636
1	1	1	30.5755	30.5829	43.4327	26.5783	18.0792	25.6659	61.0254	57.318	69.359	11.3177	20.6386	24.9772	43.3119	44.2793	52.7658	64.1335	51.8541	59.1544	13.3102	9.69372	14.6399	63.6555	50.1363	52.6989	65.5964	50.8656	73.3315
				34.8637			23.4412			62.5675			18.9778			46.7857			58.3807			12.5479			55.4969			63.2645
Silencing
qRT-PCR
LjG10H relative transcript level
WT	Line-1	Line-2	Line-3	Line-4	Line-5	Line-6
1	0.257562	0.473207	0.569824	0.372918	0.126651	0.292107
1	0.262435	0.434423	0.491581	0.372307	0.122652	0.300713
1	0.252311	0.394727	0.443272	0.500713	0.14854	0.354928
	WT	WT	WT	Line-1	Line-1	Line-1	Line-2	Line-2	Line-2	Line-3	Line-3	Line-3	Line-4	Line-4	Line-4	Line-5	Line-5	Line-5	Line-6	Line-6	Line-6
Actin	20.8005	20.6948	20.7496	19.5844	19.2199	18.6063	19.0252	19.2688	19.5247	19.3745	19.623	19.3859	19.2056	19.0526	19.089	18.2421	18.2925	18.3506	19.1327	18.8616	18.8773
LjG10H	22.9863	22.7948	22.7892	23.3269	23.2642	23.1776	22.5255	22.6136	22.3119	22.443	22.3833	22.3296	22.5316	22.73	22.7281	23.4142	23.3688	23.3708	22.9746	22.8008	22.7556
dt	2.18573	2.09996	2.03962	3.74243	4.04434	4.57134	3.50024	3.34484	2.78716	3.06848	2.76026	2.94366	3.32603	3.67733	3.63909	5.17209	5.07629	5.02017	3.84192	3.93928	3.87823
ddt	0	0	0	1.5567	1.94438	2.53172	1.31451	1.24488	0.747537	0.882748	0.660296	0.904036	1.14031	1.57737	1.59947	2.98636	2.97633	2.98055	1.65619	1.83932	1.83861
2-ddt	1	1	1	0.339928	0.259826	0.172932	0.402061	0.421942	0.59562	0.542333	0.632749	0.53439	0.453664	0.335092	0.329998	0.126188	0.127068	0.126697	0.317275	0.279453	0.279592
		1			0.257562			0.473207			0.569824			0.372918			0.126651			0.292107
Actin	20.8005	20.6948	20.7496	19.5844	19.2199	18.6063	19.0252	19.2688	19.5247	19.3745	19.623	19.3859	19.2056	19.0526	19.089	18.2421	18.2925	18.3506	19.1327	18.8616	18.8773
LjG10H	22.7145	22.7994	22.58	23.1059	23.1919	22.8705	22.5024	22.4697	22.3634	22.394	22.5222	22.4222	22.6464	22.2973	22.5808	23.3852	23.3092	23.1417	22.7842	22.5023	22.6654
dt	1.91395	2.1046	1.83046	3.52143	3.97206	4.26427	3.47714	3.20095	2.83865	3.01953	2.89924	3.03623	3.44082	3.24468	3.49176	5.14313	5.01668	4.79106	3.65146	3.64078	3.78808
ddt	0	0	0	1.60747	1.86745	2.43381	1.56319	1.09635	1.00819	1.10557	0.794634	1.20578	1.52687	1.14008	1.6613	3.22917	2.91207	2.9606	1.7375	1.53617	1.95762
2-ddt	1	1	1	0.328173	0.274057	0.185075	0.338402	0.467698	0.49717	0.464718	0.576489	0.433536	0.34703	0.453735	0.316154	0.10664	0.132855	0.128461	0.299889	0.344799	0.257453
		1			0.262435			0.434423			0.491581			0.372307			0.122652			0.300713
Actin	20.8005	20.6948	20.7496	19.5844	19.2199	18.6063	19.0252	19.2688	19.5247	19.3745	19.623	19.3859	19.2056	19.0526	19.089	18.2421	18.2925	18.3506	19.1327	18.8616	18.8773
LjG10H	22.7348	22.4803	22.5865	23.1401	22.974	22.946	22.6091	22.4162	22.4314	22.5425	22.3064	22.6653	21.8794	22.1299	21.9411	22.9804	22.8286	22.888	22.4012	22.302	22.2261
dt	1.93421	1.78549	1.83696	3.55564	3.75417	4.33974	3.58385	3.14744	2.9067	3.16798	2.6834	3.27938	2.67382	3.07727	2.85206	4.73834	4.53602	4.53738	3.26854	3.44048	3.34877
ddt	0	0	0	1.62144	1.96868	2.50278	1.64965	1.36195	1.06974	1.23378	0.897908	1.44242	0.739615	1.29178	1.0151	2.80414	2.75053	2.70042	1.33434	1.65499	1.51181
2-ddt	1	1	1	0.325011	0.255487	0.176436	0.318718	0.389056	0.476405	0.425202	0.536664	0.36795	0.598899	0.408446	0.494793	0.143176	0.148597	0.153848	0.396574	0.317539	0.350672
		1			0.252311			0.394727			0.443272			0.500713			0.14854			0.354928
root	stem	leaf	flower	fruit
1	3.50122	5.2214	21.9489	0.724212
1	2.26806	3.26239	19.8816	0.638795
1	2.88452	4.28474	18.1457	0.743388
	root	root	root	stem	stem	stem	leaf	leaf	leaf	flower	flower	flower	fruit	fruit	fruit
Actin	17.2004	17.0793	17.0099	17.1149	17.2534	17.5222	18.0676	18.2466	18.0594	22.208	22.2686	22.6143	16.9592	17.2969	16.8881
LjG10H	26.8385	26.8547	26.5121	25.0925	25.3819	24.9504	25.54	25.1622	25.5912	27.4608	27.6591	27.5282	27.0976	27.1915	27.2661
dt	9.63815	9.77537	9.50218	7.97751	8.12848	7.42816	7.47244	6.91563	7.53187	5.25275	5.39048	4.91391	10.1384	9.89453	10.378
ddt	0	0	0	-1.66063	-1.64688	-2.07401	-2.1657	-2.85974	-1.9703	-4.38539	-4.38489	-4.58826	0.500268	0.119164	0.875832
2-ddt	1	1	1	3.16155	3.13157	4.21056	4.48685	7.25885	3.9185	20.8995	20.8921	24.055	0.706975	0.920721	0.54494
		1			3.50122			5.2214			21.9489			0.724212
Actin	17.4176	17.5936	17.6304	17.7416	17.6649	17.9172	18.7252	18.8942	18.7138	24.19	24.7291	24.3102	18.206	17.9132	17.9382
LjG10H	26.0862	26.1986	26.1251	25.3615	25.0121	25.1827	25.7053	25.6003	25.7054	28.7891	28.5394	28.8885	27.2619	27.1871	27.3684
dt	8.66855	8.60498	8.4947	7.6199	7.34717	7.26557	6.98007	6.70605	6.99154	4.59903	3.81029	4.57827	9.05589	9.27388	9.4302
ddt	0	0	0	-1.04865	-1.25781	-1.22913	-1.68848	-1.89893	-1.50316	-4.06952	-4.79469	-3.91643	0.387346	0.668897	0.935498
2-ddt	1	1	1	2.06859	2.39132	2.34425	3.22316	3.72938	2.83463	16.7899	27.7554	15.0995	0.764535	0.628987	0.522862
		1			2.26806			3.26239			19.8816			0.638795
Actin	16.8376	16.9263	17.2492	17.411	17.3431	17.1689	18.2331	18.3978	17.9976	22.3079	22.4699	22.5612	17.2414	17.5725	17.1407
LjG10H	26.6763	26.2871	26.6769	25.3807	25.2442	25.4265	25.8699	25.4016	25.7787	27.8615	27.7992	27.7725	27.1623	27.4744	27.3093
dt	9.83867	9.3608	9.4276	7.96966	7.90108	8.25754	7.63687	7.00378	7.78116	5.5536	5.3293	5.21128	9.92087	9.90191	10.1686
ddt	0	0	0	-1.869	-1.45971	-1.17006	-2.20179	-2.35701	-1.64645	-4.28507	-4.0315	-4.21632	0.0822072	0.541119	0.741026
2-ddt	1	1	1	3.6528	2.75053	2.25021	4.60051	5.12309	3.13062	19.4955	16.3532	18.5883	0.944611	0.687238	0.598314
		1			2.88452			4.28474			18.1457			0.743388
